# Supplementary material for: Monovalent Salt and pH-Stimulated Gelation of Scallop (Patinopecten yessoensis) Male Gonad Hydrolysates/κ-Carrageenan
Source: MDPI journal article supplement (doi:10.3390/foods12193598), 2023-09-28
Supplement: s1 [file s1]

Table S1  $T_2$  relaxation time curves of SMGHs/KC gels subjected to pH 2-8 and 0.2 M NaCl-stimuli-response.

| pH | Relaxation time ( $ms$ ) |                       |
|----|--------------------------|-----------------------|
|    | $T_{21}$ ( $ms$ )        | $T_{23}$ ( $ms$ )     |
| 8  | $0.58 \pm 0.06^a$        | $966.40 \pm 39.17^a$  |
| 5  | $0.64 \pm 0.11^a$        | $1035.88 \pm 41.99^a$ |
| 2  | $0.49 \pm 0.03^a$        | $365.64 \pm 14.82^b$  |

Data were expressed as means $\pm$ SD from triplicate determinations. Different letters in the same column indicated significant differences ( $P < 0.05$ ).

Table S2  $T_2$  relaxation time curves of SMGHs/KC gels subjected to pH 3-9 and 0.2 M KCl-stimuli-response.

| pH | Relaxation time ( $ms$ ) |                       |
|----|--------------------------|-----------------------|
|    | $T_{21}$ ( $ms$ )        | $T_{23}$ ( $ms$ )     |
| 9  | $0.70 \pm 0.12^a$        | $622.26 \pm 0.00^a$   |
| 6  | $0.62 \pm 0.07^a$        | $1086.11 \pm 75.36^b$ |
| 3  | $0.53 \pm 0.19^a$        | $276.98 \pm 11.23^c$  |

Data were expressed as means $\pm$ SD from triplicate determinations. Different letters in the same column indicated significant differences ( $P < 0.05$ ).
